# 1 Integrating Multidimensional Data Analytics for Precision Diagnosis 2 of Chronic Low Back Pain

3 Sam Vickery<sup>1\*</sup>, Frederick Junker<sup>1</sup>, Rebekka Döding<sup>1</sup>, Daniel L Belavy<sup>1</sup>, Maia Angelova<sup>2,3</sup>,  
4 Chandan Karmakar<sup>3</sup>, Louis Alexander Becker<sup>4,5</sup>, Nima Taheri<sup>4,5</sup>, Matthias Pumberger<sup>4</sup>,  
5 Sandra Reitmaier<sup>5</sup>, Hendrik Schmidt<sup>5</sup>

6  
7 <sup>1</sup> Division of Physiotherapy / Department of Applied Health Sciences | Hochschule für  
8 Gesundheit (University of Applied Sciences) | Bochum | Germany

9 <sup>2</sup> Aston Digital Futures Institute | Aston University| Birmingham | United Kingdom

10 <sup>3</sup> School of Information Technology | Deakin University | Geelong | Australia

11 <sup>4</sup> Center for Musculoskeletal Surgery, Charité – Universitätsmedizin Berlin, Berlin, Germany

12 <sup>5</sup> Julius Wolff Institut, Berlin Institute of Health - Charité at Universitätsmedizin Berlin |  
13 Berlin | Germany

## 15 **Abstract**

16 Low back pain (LBP) is a leading cause of disability worldwide, with up to 25% of cases  
17 become chronic (cLBP). Optimal diagnostic tools for cLBP remains unclear. Here we leveraged  
18 a comprehensive multi-dimensional data-set and machine learning-based feature importance  
19 selection to identify the most effective diagnostic tools for cLBP patient stratification. The  
20 dataset included questionnaire data, clinical and functional assessments, and spino-pelvic  
21 magnetic resonance imaging (MRI), encompassing a total of 144 parameters from 1,161 adults  
22 with (n=512) and without cLBP (n=649). Boruta and random forest were utilised for variable  
23 importance selection and cLBP classification respectively. Boruta feature selection led to  
24 pronounced variable reduction (median of all 15 datasets: 63.3%), while performing

**NOTE: This preprint reports new research that has not been certified by peer review and should not be used to guide clinical practice.**

25 comparable to using all variables across all modality datasets. Multi-modality models  
26 performed better than single modality models. Boruta selected key variables from  
27 questionnaire, clinical, and MRI data were the most effective in distinguishing cLBP patients  
28 from controls with an AUC (area under the receiver operating characteristic curve) of 0.699  
29 (95% confidence interval [CI], 0.669 – 0.729). The most robust features (n=9) across the whole  
30 dataset identified were psychosocial factors, neck and hip mobility, as well as lower lumbar  
31 disc herniation and degeneration. These critical variables (AUC = 0.664, 95% CI = 0.514 –  
32 0.814) outperformed all parameters (AUC = 0.602, 95% CI = 0.538 – 0.666) in an unseen  
33 holdout dataset, demonstrating superior patient delineation. Paving the way for targeted  
34 diagnosis and personalized treatment strategies, ultimately enhancing clinical outcomes for  
35 cLBP patients.

36

## 37 **Key words**

38 Chronic low back pain; classification; data-driven; feature selection; multi-modality;  
39 psychosocial; MRI

40

## 41 **CRediT Table**

| <b>Term</b>                | <b>Who?</b>                                  | <b>Definition</b>                                                                                                                                                                                             |
|----------------------------|----------------------------------------------|---------------------------------------------------------------------------------------------------------------------------------------------------------------------------------------------------------------|
| Conceptualization          | SV, HS, DLB                                  | Ideas; formulation or evolution of overarching research goals and aims                                                                                                                                        |
| Methodology                | SV, HS, DLB, MA, CK                          | Development or design of methodology; creation of models                                                                                                                                                      |
| Software                   | SV, FJ                                       | Programming, software development; designing computer programs; implementation of the computer code and supporting algorithms; testing of existing code components                                            |
| Validation                 | SV                                           | Verification, whether as a part of the activity or separate, of the overall replication/ reproducibility of results/experiments and other research outputs                                                    |
| Formal analysis            | SV, FJ                                       | Application of statistical, mathematical, computational, or other formal techniques to analyze or synthesize study data                                                                                       |
| Investigation              | SV, LAB, NT, MP, SR                          | Conducting a research and investigation process, specifically performing the experiments, or data/evidence collection                                                                                         |
| Resources                  | HS, DLB                                      | Provision of study materials, reagents, materials, patients, laboratory samples, animals, instrumentation, computing resources, or other analysis tools                                                       |
| Data Curation              | SV, FJ                                       | Management activities to annotate (produce metadata), scrub data and maintain research data (including software code, where it is necessary for interpreting the data itself) for initial use and later reuse |
| Writing - Original Draft   | SV, DLB, FJ, RD, HS,                         | Preparation, creation and/or presentation of the published work, specifically writing the initial draft (including substantive translation)                                                                   |
| Writing - Review & Editing | DLB, HS, RD, FJ, SV, NT, LAB, MP, SR, MA, CK | Preparation, creation and/or presentation of the published work by those from the original research group, specifically critical review, commentary or revision – including pre-or postpublication stages     |
| Visualization              | SV, FJ                                       | Preparation, creation and/or presentation of the published work, specifically visualization/ data presentation                                                                                                |
| Supervision                | HS, DLB, MA, CK                              | Oversight and leadership responsibility for the research activity planning and execution, including mentorship external to the core team                                                                      |
| Project administration     | HS, SV                                       | Management and coordination responsibility for the research activity planning and execution                                                                                                                   |
| Funding acquisition        | HS, DLB                                      | Acquisition of the financial support for the project leading to this publication                                                                                                                              |

42

## 43 **Glossary**

44 AUC - area under the receiver operating characteristic curve

45 BMI – body mass index

46 C – Clinical examination

47 CI – confidence interval

48 cLBP – Chronic low back pain

49 FABQ - Fear-Avoidance Belief Questionnaire

50 IPAQ - International Physical Activity Questionnaire

51 IVD – intervertebral disc

52 M – MRI

53 MET – metabolic equivalents

54 MRI - magnetic resonance imaging

55 Q – Questionnaire

56 RMDQ - Disability Questionnaire: Roland and Morris

57 S - Back shape and function

58 SF-36 - Short-form 36 Health Status Questionnaire

59 SRBAI - Self-Report Behavioural Automaticity Index

60 TSK-GV - Tampa Scale for Kinesiophobia

61

## 62 **Introduction**

63

64 Chronic low back pain (cLBP) represents a significant social and economic burden to society  
65 with increasing numbers of patients requiring surgical or non-surgical treatment. Several  
66 studies showed that 70–85% of the global population suffers cLBP at some point in their life <sup>5</sup>,  
67 of which 4–25% become chronic <sup>34</sup>. Both surgical (e.g., spinal fusion) and non-surgical (e.g.,  
68 rehabilitation and pharmacological) treatments for cLBP have risen tremendously in recent  
69 years compared to other major musculoskeletal conditions <sup>12,69</sup>. However, the treatment  
70 outcomes of both are still inconsistent, which is reflected in a high rate of treatment-refractory  
71 cLBP patients <sup>17</sup>.

72

73 Addressing chronic pain as a multidimensional phenomenon is a major challenge in practice.  
74 This challenge is exacerbated <sup>41,51</sup> by the number of potential factors that may differentiate pain  
75 from pain-free and a lack of consensus as to what key parameters are. Studies have shown that  
76 permanent changes in central nervous system sensitisation contribute to the persistence of pain  
77 <sup>47,59</sup>, as opposed to acute pain, which typically resolves as tissue heals Previous meta-analyses  
78 <sup>55</sup> underscored that experience of cLBP is related to physical, psychological and social  
79 elements, highlighting the need for a multifaceted approach to pain assessment.

80

81 Adopting a broader perspective on chronic pain, and assessing multidimensional data, promises  
82 to advance pain management. In particular, elucidating relevant or irrelevant assessment factors  
83 may strengthen the reliability of a diagnosis and thus make treatment more targeted. However,  
84 despite the recognition of physical, psychological, and social domains contributing to pain, as  
85 highlighted in recent work <sup>55</sup>, examining these domain in the same population is currently  
86 lacking.

87

88 Machine learning algorithms provide models for identifying distinct subgroups that elucidate  
89 the occurrence and characteristics of a disease<sup>29,31</sup>. A previous systematic review by our team  
90 using machine learning applications in LBP<sup>53</sup> highlighted that a narrow range of mechanistic  
91 domains have been assessed, and sample sizes in these studies were consistently small, ranging  
92 up to only 171 participants. Consequently, probing limited data and modalities limits the  
93 robustness and applicability of such models. Through gathering many data points across  
94 multiple modalities one can ascertain which variables and modalities are the most informative  
95 at distinguishing cLBP patients from asymptomatic controls. Reducing the number of variables  
96 to those that are most informative has been previously employed in predictive and classification  
97 modelling to improve accuracy<sup>37,39</sup>. This approach can be applied as the main outcome and not  
98 only in model preprocessing, in order to obtain a data-driven decision on the most important  
99 variables in multi-dimensional clinical data. Such a systematic data-informed investigation of  
100 back pain diagnosis in a large multi-modality sample is lacking to help inform future studies in  
101 selecting which data to acquire and for clinicians in which tests to conduct. Therefore, the aim  
102 of this study was to identify and compare the most informative domains and variables in  
103 delineating patients with and without cLBP utilising a large multi-modality dataset.  
104

## 105 Materials and methods

### 106 Study design

107 The prospective cross-sectional study draws its data from the ongoing “Berliner Rückenstudie”  
108 (“Berlin Back Study”; [https://spine.charite.de/en/spine\\_study/](https://spine.charite.de/en/spine_study/); running time: 01/01/2022 to  
109 31/12/2025), which was registered at the German Clinical Trial Register (DRKS-ID:  
110 [DRKS00027907](https://www.drks.de/DRKS000027907)). Recruitment procedures vary from local promotion (i.e., postal flyers, notice  
111 boards, internet approaches, and social media) at the Charité-Universitätsmedizin Berlin, in  
112 the general public (i.e., newspapers, magazines, podcasts) to cooperation with local companies,  
113 administrative authorities, and word-of-mouth. The protocol is in accordance with the Helsinki  
114 Declaration of ethical principles<sup>67</sup> and has been approved by the Ethics Committee of the  
115 Charité – Universitätsmedizin Berlin (registry numbers: EA4/011/10, EA1/162/13). Written  
116 informed consent was obtained from all participants. The STROBE guideline<sup>63</sup> (Supplemental  
117 Table 1) and TRIPOD statement<sup>10</sup> (Supplemental Table 2) for prediction model development  
118 were used to report this study. Data collection started on 1st January 2022 and cut-off for  
119 inclusion in the current analysis was 5th April 2024. Data collection occurred in a research  
120 centre within a university-hospital.

121

### 122 Participants

123 Study participants were recruited through a telephone interview and excluded if they met any  
124 exclusion criteria, as well as some excluded at the testing site (Supplementary Table 3). A total  
125 of 1273 participants were included in the study at cut-off point. These participants were initially  
126 guided through self-administered questionnaires by a study coordinator. Then they continued

127 to a clinical examination by a trained medical doctor, which included physical examinations,  
128 questions, as well as a back shape and function test. The examinations and questionnaires took  
129 a total of 90 minutes to complete. Additionally, participants were offered a magnetic resonance  
130 imaging (MRI) within 14 days of the spino-pelvic region. During the clinical assessment the  
131 participants were classified by the clinician as asymptomatic (no back pain), symptomatic  
132 (cLBP), or previously suffering from cLBP. To ensure a more robust cLBP patient classification  
133 previous symptomatic subjects were removed from the sample. Furthermore, participants who  
134 revoked their inclusion in the study and those who were missing demographic data; age, sex,  
135 body mass index (BMI), and patient status were removed. This resulted in a study sample of  
136 1161 subjects that included 649 asymptomatic (19 – 72 years old, mean age =  $40.7 \pm 12.6$ ,  
137 females = 353) and 512 cLBP (19 – 65 years old, mean age =  $43.5 \pm 11.7$ , females = 306)  
138 participants. This sample was sub-divided into four modalities; questionnaires (Q), clinical  
139 physical assessment (C), back shape and function (S), and MRI (M). Only participants with all  
140 data within a particular dataset modality were considered for modelling and no interpolation  
141 was conducted.

142

## 143 Quantitative variables and data collection

144 Patients had to meet all of the following inclusion criteria: written informed consent to  
145 participate in the study, asymptomatic (no back pain) or symptomatic (cLBP) caucasian women  
146 and men aged 18–67 years, pain duration  $\geq 12$  weeks daily (cLBP only), pain localization in the  
147 lumbopelvic region (cLBP only). A telephone interview was conducted during recruiting and  
148 subjects were excluded if they met any exclusion criteria. However, some subjects came to  
149 testing that should have been excluded during the telephone interview, and were then excluded  
150 at the testing site (Supplementary Table 3). No minimal threshold for LBP intensity was



151 defined. A list of all variables including number of missing values is shown in Supplementary  
152 Table 4.

## 153 154 Questionnaires

155 The localization, type, course, possible radiation, intensity, quality, duration, and any factors  
156 that may relieve or exacerbate the pain, as well as possible triggers or the patient's own  
157 explanations regarding the cause of the pain has been asked. The patient's medical history has  
158 been recorded, which includes any previous diseases and surgeries, and a detailed pain and  
159 general medication history as well as allergies, intolerances, and vaccination status among  
160 others. A family and social history (anamnesis) was taken (professional activity, family  
161 situation, diseases in the family, stressful situations, etc.). In addition, any past or present use  
162 of addictive substances has been asked (alcohol, nicotine, etc.).

163 The following questionnaires were completed within 30 minutes:

- 164 ➤ Pain intensity and duration and pain-related disability: von Korff et al. <sup>64</sup>
- 165 ➤ Disability Questionnaire: Roland and Morris (RMDQ) <sup>46</sup>
- 166 ➤ Short-form 36 Health Status Questionnaire: SF-36 <sup>66</sup>. The following four domains were  
167 considered: general mental health (psychological distress and well-being), limitations in  
168 usual role activities because of emotional problems, vitality (energy and fatigue), and  
169 general health perceptions.
- 170 ➤ International Physical Activity Questionnaire (IPAQ) <sup>11</sup>
- 171 ➤ Self-Report Behavioural Automaticity Index (SRBAI) <sup>15</sup>
- 172 ➤ Behavioural Regulation in Sport Questionnaire (BRSQ) <sup>30</sup>
- 173 ➤ Tampa Scale for Kinesiophobia (TSK-GV) <sup>48</sup>.
- 174 ➤ Fear-Avoidance Belief Questionnaire (FABQ) <sup>65</sup>.

175 The participants primarily answered the questionnaires in digital form using a survey program  
176 specially developed for the study. The data were collected under similar conditions (e.g., same  
177 room, same computer) for all subjects at the study centre.

178

## 179 Demographic data

180 During the clinical assessment, age, sex, body height, body weight, hip diameter, and waist  
181 diameter of the subjects were recorded. BMI was chosen instead of waist hip ratio to measure  
182 physical body size and health, as the BMI variable contained less missing values compared to  
183 waist hip ratio (Supplementary Table 4).

184

## 185 Clinical examination

186 The clinical examination included the evaluation of organ functions (inspection, palpation,  
187 percussion, and auscultation), the general impression, and the vital parameters of the patient  
188 (temperature, heart rate, blood pressure, etc.). It was performed by an experienced orthopaedic  
189 consultant. The neurological status was assessed by the examination of the coordination,  
190 reflexes, sensitivity, and motor function. The evaluation of the functional parameters, that is,  
191 the assessment of posture, shape, orientation, and movement of the lumbar spine and pelvis,  
192 was based on current clinical standards (e.g., Ott and Schober test, 3-step hyperextension test,  
193 passive lumbar extension test, etc.) and self-assessment by the persons investigated. Data were  
194 documented according to their dimension using distances in cm, degrees of angle, and number  
195 of repetitions per defined time interval or bivalent whether pain provocation occurred. Self-  
196 assessment of functional restrictions of the back was recorded according to a scale from 1 (best)  
197 – 10 (worst).

198

## 199 Back shape and function

200 All study participants received measurements of the back shape in the sagittal and frontal planes  
201 during upright standing and sitting using the Idiag M360 (Idiag AG, Fehraltorf, Switzerland).  
202 The device measures segmental angles of the thoracic and lumbar spine. In both postures, study  
203 participants were measured upright, in flexed, extended, and in left and right lateral bending (3  
204 repetitions, ~10 sec each). Maximum upper body flexion, extension, as well as left and right  
205 lateral bending were performed with extended knees. During extension the arms were crossed  
206 in front of the body. The order of performed tasks was randomised. The measurements were  
207 performed by trained medical students. The validity and reliability were demonstrated in  
208 previous studies <sup>7,13,18,60</sup>.

209

## 210 Spino-pelvic MRI

211 MRIs were conducted using a 1.5 MRI scanner. Following sequences were evaluated: 1) Sag  
212 T1 (4 mm slices), 2) Sag T2 (4 mm slices), 3) Cor STIR-T2 (4 mm slices) and 4) Axial T2  
213 (3 mm slices). MRIs were evaluated for intervertebral disc degeneration (Pfirrmann  
214 classification <sup>42</sup>), disc herniation (Kramer classification <sup>25</sup>), facet joint arthrosis (Fujiwara  
215 classification <sup>14</sup>), osteochondrosis intervertebralis <sup>36</sup>, spondylolisthesis (Meyerding  
216 classification <sup>35</sup> and spinal canal stenosis (Schizas classification <sup>50</sup>) at each level of the lumbar  
217 spine. The spino-pelvic MRI evaluation was performed blinded by two spine surgeons and a  
218 radiologist, all of whom have many years of experience in the evaluation of spinal pathologies.  
219 The inter-rater reliability was good-to-excellent for all measurement parameters.

220

## 221 Data storage

222 All data files electronically recorded during the study period were stored on a database server  
223 folder (SharePoint folder) hosted by Charite-Universitaetsklinikum. A data back-up for the

224 database is run daily. Local study team members signed a non-disclosure agreement. They have  
225 access to the database using a personal password. They are authorized for entries depending on  
226 their function based on a role concept (investigator, statistician, monitor, administrator etc.) that  
227 regulates permission for each user. A multilevel data validation plan was developed to  
228 guarantee the correctness and consistency of the data. Data were entered only after a check for  
229 completeness and plausibility. Furthermore, data were cross-checked for plausibility with  
230 previously entered data for each participant. Questionnaires filled out on paper are stored in a  
231 lockable cabinet at the university.

232

### 233 Potential sources of bias and minimisation

234 To generally reduce the possible location and assessor bias, measurements (clinical physical  
235 and questionnaire assessment and back shape and function) were administered by a few trained  
236 clinicians in the same room with the same lighting. The self-administered questionnaires (von  
237 Korff, RMDQ, SF-36, IPAQ, SRBAI, BRSQ, TSK-GV, and FABQ) were completed by the  
238 subjects under supervision by our trained study coordinator who provided explanations for  
239 unclear questions and mitigated possible lack of motivation to complete the questions by  
240 assuring the subjects of the importance to complete the questionnaires. Furthermore, generic  
241 questionnaires (SF-36 or IPAQ) were placed before specific ones (SRBAI, BRSQ) to minimize  
242 bias from order effects.

243

244 To minimise the bias in our classification and feature selection, model as well as the modality  
245 comparison, variables directly assessing back pain and questions heavily biased to pain patients  
246 were removed. Such variables assessed back pain during particular movements or upon physical  
247 manipulation. Furthermore, questions only back pain patients were asked for example, pain  
248 intensity, duration, and disability, as well as pain and health biased self-questionnaires (von

249 Korff, RMDQ, TSK-GV, FABQ, therapies, and the SF-36 sub-categories regarding physical  
250 function, physical role function, physical pain, health perception, and vitality), and clinician  
251 administered questions regarding pain medication intake, previous spinal disorder diagnosis,  
252 and participants' subjective physical health assessment were removed to reduce model bias.

253

## 254 **Outcome**

255 The outcome target for our classification model is cLBP patients. All participants were assessed  
256 by a clinician and diagnosed as cLBP patient, asymptomatic control, or suffered from LBP in  
257 the past but not at present. We used the clinician diagnosis of either current cLBP patient or  
258 asymptomatic control as our two-class target outcome. The participants with LBP in the past  
259 were removed to enable better distinguishable groups for binary classification and feature  
260 importance selection.

261

## 262 **Data handling, preprocessing, cleaning and missing data**

263 The variables can be distinguished into four modalities; questionnaires, clinical assessment,  
264 back shape and function and motion, and spino-pelvic MRI. Each modality was combined with  
265 demographic data (age, sex, and BMI) and then joined with all combinations of the four  
266 modalities. This resulted in 15 dataset containing either single-modality, dual-modalities, or  
267 multi-modalities data (Fig. 1A). An overview of all variables removed including the reason can  
268 be found in Supplementary Table 5 and a list of all variables (144) used for modelling is  
269 presented in Supplementary Table 6.

270

271 Total and sub-scores for the self-administered questionnaires were used after removal of pain  
272 biased questionnaires (see *Potential sources of bias and minimisation*). This includes the SF-  
273 36<sup>66</sup>, the IPAQ<sup>11</sup>, the SRBAI<sup>15</sup>, and the BRSQ<sup>30</sup>. The SF-36 was used to collect statements

274 related to the health domains ‘emotional role limitation, (three items) ‘social functioning’ (two  
275 items), and ‘mental health’ (five items). A scoring algorithm was used to convert the raw scores  
276 into these three domains. The scores were transformed to range from zero (worst possible  
277 health) and 100 (best possible health). The SRBAI and BRSQ collected ratings for multiple  
278 statements on a numerical scale from 1 (strongly disagree) to 6 (strongly agree). For the SRBAI,  
279 the total score was calculated by summing the numerical values across all 4 statements. In  
280 contrast, sub-scores were created for the BRSQ that related to ‘intrinsic motivation’, ‘integrated  
281 regulation’ and ‘external regulation’. These scores were calculated by summing the numerical  
282 values across two statements per sub-score. The IPAQ, recorded the average time spent per day  
283 over the past 7 days while ‘sitting’, ‘walking’, doing ‘moderate activities’ (e.g., heavy lifting,  
284 digging, aerobics, or fast bicycling), and ‘vigorous activities’ (e.g. carrying light loads,  
285 bicycling at a regular pace, or doubles tennis). To estimate the energy requirements for each  
286 activity type, the average time spent per day in minutes was multiplied by MET-score  
287 (metabolic equivalents) of 1.5, 3.3, 4, or 8 for sitting, walking, moderate and vigorous activities,  
288 respectively. This resulted in MET-minutes scores, describing the amount of energy in  
289 kilocalories required for a 60 kilogram person. Finally, the MET-minutes scores were summed  
290 across ‘sitting’, ‘walking’, ‘moderate activities’ and ‘vigorous activities’, resulting in a total  
291 MET-minutes score per subject.

292  
293 Modelling preprocessing was conducted by checking variables within each modality for very  
294 low variance and collinearity. Features with close to zero (variance  $< 1$ ) variance were removed.  
295 Furthermore, features presenting a Spearman correlation greater than 0.9 were also removed to  
296 reduce collinearity between features. The decision on which of the correlated features to  
297 removed, was the feature showing less correlation to the target, cLBP patient status. Following  
298 these cleaning steps, single data modalities were joined with demographic data and then for the  
299 dual- and multi-modalities datasets join with other datasets. Subjects having any missing values

300 were removed from our analyses and therefore no imputation was conducted. Following  
 301 cleaning and preprocessing modality dataset presented different number of subjects and features  
 302 with a similar age and sex distribution across cLBP patients and asymptomatic controls (Fig.  
 303 1A).  
 304

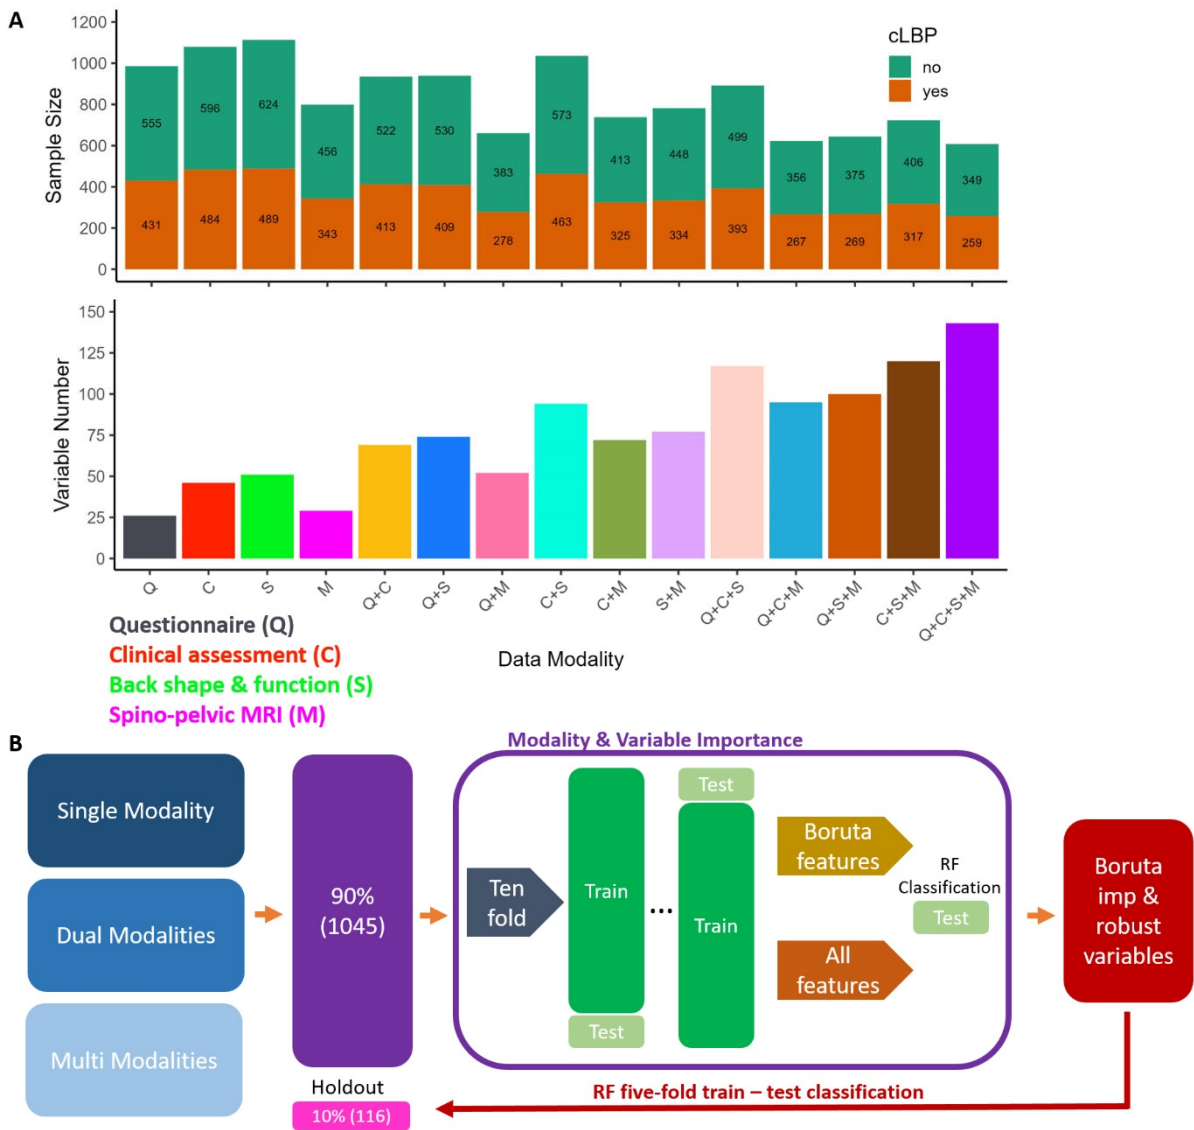

305  
 306 **Figure 1. Modality dataset distributions and machine learning workflow.** A – Top shows the chronic  
 307 low back pain (cLBP) sample size distribution across all 15 dataset modalities. Bottom presents the  
 308 number of variables used for cLBP classification and variable importance selection across the 15 dataset  
 309 modalities. B – Represents the machine learning workflow implemented to compare the different  
 310 modalities and determine the most important variables for cLBP patient delineation using a random  
 311 forest binary classification algorithm for training and testing.  
 312

## 313 Univariate statistics

314 The univariate statistics were carried out separately for continuous, ordinal and nominal data to  
315 compare patients suffering from cLBP against asymptomatic controls using R (version 4.3.1;  
316 [www.r-project.org](http://www.r-project.org)). As most continuous variables did not follow a normal distribution  
317 according to the Anderson-Darling test<sup>4</sup>, we implemented the non-parametric Wilcoxon-Mann-  
318 Whitney test to determine significant difference between cLBP patients and asymptomatic  
319 controls for ordinal and continuous data. Hence, u-values, z-values, r-value (effect sizes), as  
320 well as the p-value are reported from. Nominal data were compared using the Chi-Square test  
321 and reported with  $\chi^2$  values, Cohen's  $\omega$ -values (effect size), and p-values. Statistical  
322 significance was determined at  $p \leq 0.05$  following family wise error (FWE)<sup>21</sup> correction for  
323 multiple comparisons within each modality (demographics, questionnaires, clinical  
324 examinations, superficial spine morphology and motion, and spino-pelvic MRI).

## 325 Machine learning

### 326 Boruta feature selection

327 We used the Boruta method<sup>26</sup> for importance feature selection. Boruta utilises random forest  
328 (RF) classification algorithm<sup>8</sup> with both the real variables and set of 'dummy' or 'shadow'  
329 variables, that are created by shuffling the feature values. This creates random variables  
330 (dummy features) that have the same distribution as the original features, although represent  
331 the classification accuracy of this feature randomly sampled. As these dummy features  
332 represent random noise, they have had their possible correlation to the target (cLBP) removed.  
333 All real and dummy features are used to classify cLBP and feature importance is calculated.  
334 Feature importance is calculated as the Z-score of the mean decrease in classification accuracy  
335 following the removal of this feature from the model. The importance of the dummy features  
336 can be used as a reference to test the feature importance of the real features. Through an iterative



337 process, real features that have significantly greater importance than the maximum dummy  
338 variable importance are marked as important. The features that have a significantly lower  
339 importance than the maximum dummy features are deemed unimportant and removed for the  
340 next iteration of selection. Iterations are repeated until the importance is assigned to all features  
341 or a user defined iteration number is reached. We used a max of 2000 iterations with a random  
342 forest containing 1000 trees. As there are occasionally a few features not definitively identified  
343 as important or removed after 2000 iterations by Boruta, we only selected the features that have  
344 been confirmed as important in our subsequent modelling and analyses.

345

## 346 Random forest classification algorithm

347 We utilised RF <sup>8</sup> implemented using the ranger package <sup>68</sup> in R (version 4.3.1, [www.r-](http://www.r-project.org)  
348 [project.org](http://project.org)) to classify cLBP patients and pain-free controls. As RF provides feature importance  
349 measures and can handle categorical, ordinal, and continuous data it represents the ideal choice  
350 to deal with the different data types present in the Berlin Back dataset. Ten-fold cross validation  
351 was conducted during model training and hyper-parameter tuning utilising 1000 tree RF. We  
352 conducted hyper-parameter tuning using a tuning parameter search grid, which contained  
353 number of variables to be sampled at each split (mtry) of 1 – square root of the number of  
354 features, and a minimum node size of 5 and 10. Therefore, using a gini split rule a grid search  
355 was conducted with all combination of hyper-parameters to determine the best. A ten-fold train-  
356 test loop (Fig. 1B) was conducted to determine the cLBP classification performance within each  
357 of the 15 datasets utilising all and Boruta selected variables independently. Model performance  
358 was calculated as follows; accuracy =  $(TP + TN) / (TP + FP + TN + FN)$ , sensitivity =  $TP / (TP$   
359  $+ FN)$ , specificity =  $TN / (TN + FP)$ , and AUC (area under the receiver operating characteristic  
360 (ROC) curve). Whereby, TP – true positive, TN – true negative, FP – false positive, and FN –

361 false negative. The ROC curve represents the classification performance measured by  
362 sensitivity and specificity over a range [0, 1] of classification thresholds.

363

## 364 Robust variable selection workflow

365 Selecting important variables and comparing the 15 different dataset modalities was conducted  
366 on 90% (n = 1045, 19 – 72 y/o, mean age =  $41.71 \pm 12.28$ , cLBP = 469) of the preprocessed  
367 Berlin Back study dataset, with a 10% (n = 116, 20 – 64 y/o, mean age =  $43.81 \pm 12.12$ , cLBP  
368 = 43) hold-out set used to evaluate the most robust and important features (Fig. 1B). The hold-  
369 out sample comprised of participants that had data for all variables. Each 15 modality datasets  
370 went through the iterative ten-fold train-test loop, where Boruta feature selection was conducted  
371 on the training set. Followed by RF training using all and Boruta selected variables  
372 implemented on the training dataset. Model performance was calculated using the test set.  
373 Across the ten loops, the percentage a variable was selected and average importance value was  
374 calculated across all 15 datasets. Finally, the variables that were selection within every train-  
375 test loop and within every possible dataset were provided as the most robust and important  
376 variables for cLBP classification. The demographic features can be selected a maximum of 15  
377 times, while the modality-specific variables a maximum of 8 times across the 15 dataset  
378 modalities. These variables were then used in a five-fold train test loop on the hold-out dataset  
379 and compared to a model trained using all variables.

380

## 381 Data and code availability

382 All results in this study are provided in the (Supplementary) tables. The Berlin Back study is  
383 currently ongoing (end date 31/12/2025) and therefore the raw data used in this manuscript  
384 cannot be provided. The raw data will be openly released from the Berlin Back Study as per

385 agreement with the funding agency following the completion of the data acquisition. A link to  
386 the raw data will be provided on the Github repository where the analysis code is located  
387 ([https://github.com/viko18/BerlinBack\\_FeatImp/](https://github.com/viko18/BerlinBack_FeatImp/)) when it is made available.

388

## 389 Results

### 390 Chronic low back pain classification

391 The best single modality for cLBP classification was Boruta selected features MRI (Fig. 2A)  
392 with a mean AUC of 0.645 with a 95% confidence interval (CI) of 0.618 – 0.672 and accuracy  
393 of 0.657 (95% CI, 0.636 – 0.678). The Boruta selected questionnaire dataset modality produced  
394 only minimally worse classification performance (mean AUC = 0.631, 95% CI = 0.610 – 0.652)  
395 than Boruta reduced and all MRI variables (mean AUC = 0.637, 95% CI = 0.599 – 0.675) using  
396 the least amount of variables (mean = 8) across all modality datasets (Fig. 2A-C). Dual and  
397 multi modalities generally performed better than single modality models in cLBP classification.  
398 Questionnaire, clinical physical assessment, and MRI (Q + C + M, Fig. 2C) modality with  
399 Boruta selected features represents the best performing modality model with a mean AUC of  
400 0.699 (95% CI, 0.669 – 0.729) and a mean accuracy of 0.709 (95% CI, 0.679 – 0.739).  
401 Moreover, this model showed the highest sensitivity (mean = 0.622, 95% CI = 0.568 – 0.676).  
402 The modality model showing the highest specificity was using all features and all modalities  
403 (Q + C + S + M, mean = 0.840, 95% CI = 0.799 – 0.881). The three best dual modalities models,  
404 C + M (mean AUC = 0.679, 95% CI = 0.633 – 0.725), Q + M (mean AUC = 0.674, 95% CI =  
405 0.623 – 0.725), and Q + C (mean AUC = 0.674, 95% CI = 0.639 – 0.709) all with Boruta  
406 selected features (Fig. 2B), performed only slightly worse than the best model (Boruta – Q + C  
407 + M). Overall back shape and function dataset using Boruta selected features produces the worst  
408 classification performance (Fig. 2A, AUC = 0.569, 95% CI = 0.538 – 0.60). Additionally, the  
409 dual modalities continuing back shape and function data always performed worse than those  
410 without (Fig. 2B), when using both all and Boruta selected features. Classification performance  
411 metrics across all models is provided in Supplementary Table 7.

412

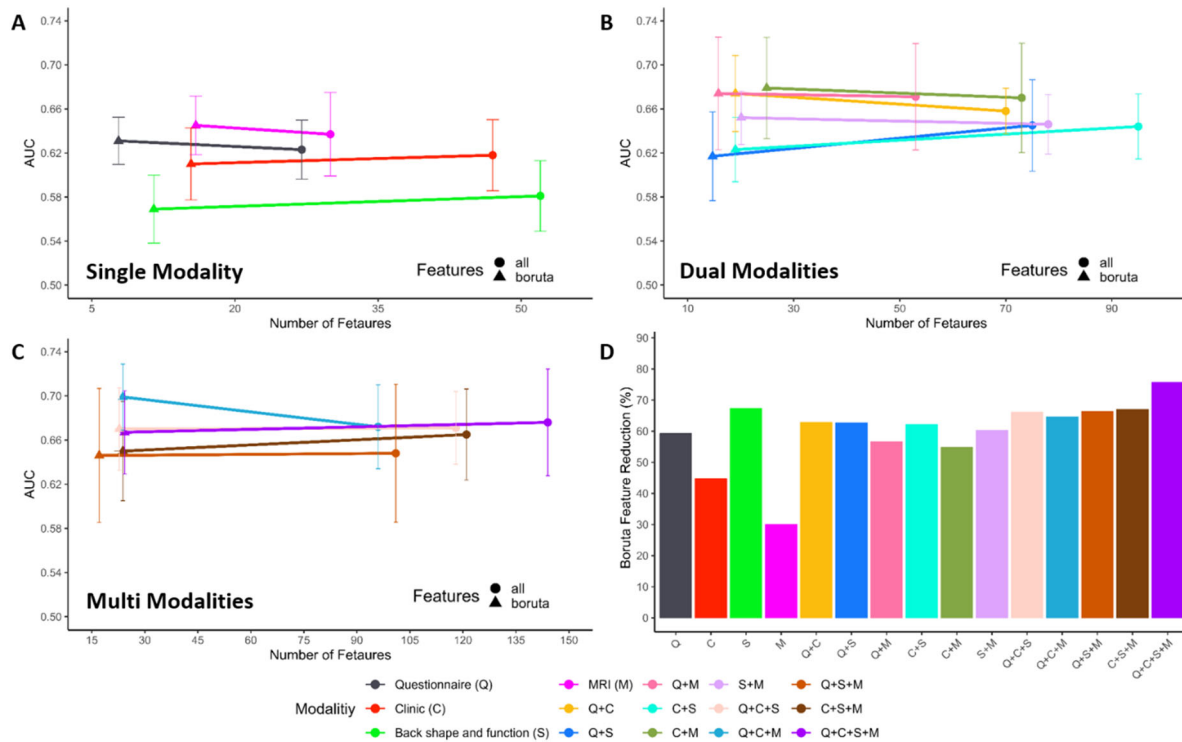

413

414 **Figure 2. Boruta feature reduction performance.** A – C shows RF classification model performance  
 415 (AUC) following the reduction of features using Boruta and all variables in the single, dual, and multi  
 416 data modalities respectively. This shows the change in performance follow feature reduction. Error bars  
 417 represent 95% CI in AUC over 10-fold train-test splits. D – Shows the amount of feature reduction by  
 418 using Boruta as a percentage of the total number of features within each modality dataset.

419

## 420 Boruta feature importance

421 Boruta feature importance selection resulted in a median of 62.7% reduction in the number of  
 422 variables across all 15 datasets (Fig. 2D). This large reduction in variables from Boruta  
 423 performed comparable (eight slightly worse and seven better) compared to using all features,  
 424 with high overlap in confidence intervals. Furthermore, three of the top five performing  
 425 modality models where those employing Boruta selected features (Supplementary Table 7). The  
 426 greatest performance improvement following Boruta feature selection was found in the Q + C  
 427 + M datasets with an AUC increase of 0.270 and an average reduction of 72.2 features (Fig.  
 428 2C). The smallest feature reduction was shown in MRI (30%) with an AUC increase of 0.008,

429 while the largest feature reduction was found in the whole dataset (Q + C + S + M) with a  
430 reduction of 75.7% of the features and an AUC decrease of 0.009.

431  
432 Boruta selected variables represented the best patient delineation performance in single, dual,  
433 and multi-modality datasets (Fig. 2A-C). MRI was found to be the best single modality model  
434 using Boruta selected features (Fig. 2A). The most important variables (Supplementary Table  
435 11) were intervertebral disc (IVD) herniation L4 – L5, spinal canal width L2, IVD degeneration  
436 L3 – L4 and L4 – L5, and spinal canal width L1, showing a mean importance across the ten  
437 iterations of 19.49, 9.94, 9.46, 9.14, and 8.13 respectively. The best dual modalities cLBP  
438 patient stratification model, Boruta selected C + M (Fig. 2B), showed the second highest AUC  
439 (mean = 0.679). The MRI variable IVD herniation L4 – L5 was found to be the most important  
440 (mean = 13.72), with clinical mobility assessments of the hip, cervical spine, and the whole  
441 body showing high importance (Supplementary Table 15). The most important and robust  
442 variables of the best performing model (Boruta – Q + C + M, Fig. 2C) contained assessments  
443 from all three modalities (Supplementary Table 18). The Short-form 36 Health Status  
444 Questionnaires (SF-36) psychological well-being, SF-36 social function, and hip pain presented  
445 a mean importance of 13.36, 13.07, and 9.71 respectively. The clinical assessment, cervical  
446 axial rotation (left) and MRI variable IVD herniation L4 – L5 each showed an importance of  
447 9.47 and 9.12. These represent the top five most important variables and the rest are provided  
448 in Table 3. The questionnaire Boruta reduced model provides a sparse model with decent  
449 performance, meaning the modality performs comparably well with a small amount of data. On  
450 average, the questionnaire Boruta model used 8 variables with a mean AUC reduction of 0.068  
451 compared to the best model (Q + C + M). The most robust and important features  
452 (Supplementary Table 8) were SF-36 social function (mean = 21.42), SF-36 psychological well-  
453 being (mean = 20.02), hip pain (mean = 15.0), smoking in pack years (mean = 11.8), and family

454 history of back pain (mean = 7.27). All Boruta selected important variables across the additional  
455 datasets are provided in Supplementary Table 8 - 22.

456

## 457 Most robust and important variables

458 To select the most robust and important variables for cLBP patient classification, the percentage  
459 of selection and average importance score was calculated across the 15 datasets (Supplementary  
460 Table 23). The features that were selected at every opportunity (100%) across the multiple  
461 iterations and datasets were defined as most important and solely implemented in cLBP  
462 classification compared to all variables. This resulted in nine robust and important variables  
463 (Fig. 3A). These variables represented psychosocial factors, IVD herniation and degeneration  
464 of the lower lumbar spine, presence of hip pain, as well as mobility of the neck and general  
465 mobility of the whole body. The performance of these nine variables were compared to all  
466 variables utilising the hold-out dataset (Fig. 1) in a five-fold train-test workflow to provide an  
467 unbiased comparison. The best nine variables showed better mean accuracy (Fig. 3B, Boruta =  
468 0.724, 95% CI = 0.593 – 0.855, All = 0.680, 95% CI = 0.625 – 0.736), AUC (Boruta = 0.664,  
469 95% CI = 0.514 – 0.814, All = 0.602, 95% CI = 0.538 – 0.666), and sensitivity (Boruta = 0.442,  
470 95% CI = 0.176 – 0.708, All = 0.298, 0.139 – 0.457), while all variables provided better  
471 specificity (Boruta = 0.892, 95% CI = 0.795 – 0.989, All = 0.902, 95% CI = 0.803 – 1.0).  
472 Moreover, all these nine variables showed significant univariate statistically significant  
473 differences between cLBP patients and asymptomatic controls in the questionnaire, clinical,  
474 and MRI datasets (Fig. 3A). Utilising a Wilcoxon-Mann-Whitney test revealed reduced scores  
475 of the SF36 for social function ( $u = 183751$ ,  $z = -7.08$ ,  $p < 0.001$ , effect size  $r = -0.225$ ) and  
476 psychological well-being ( $u = 178506.5$ ,  $z = -7.74$ ,  $p < 0.001$ ,  $r = -0.247$ ) in people suffering  
477 from cLBP. In addition, the occurrence of hip pain was also altered comparing people with and  
478 without cLBP ( $\chi^2(3, N=986) = 40.17$ ,  $p = 0.004$ ,  $\omega = 0.202$ ). Comparing clinical examinations

479 further revealed reduced cervical axial rotation to the left ( $u = 221595$ ,  $z = -7.98$ ,  $p < 0.001$ ,  $r =$   
 480  $-0.243$ ), reduced sit to stand 30 second repetition ( $u = 226818.5$ ,  $z = -6.83$ ,  $p < 0.001$ ,  $r = -$   
 481  $0.208$ ), as well as altered general mobility ( $\chi^2 (2, N=1080) = 46.81$ ,  $p = 0.006$ ,  $\omega = 0.208$ ) in  
 482 cLBP patients. Regarding MRI investigations, increased IVD degeneration at L2-L3 ( $u =$   
 483  $147168$ ,  $z = 3.38$ ,  $p = 0.011$ ,  $r = 0.120$ ) and L4-L5 ( $u = 147691$ ,  $z = 3.43$ ,  $p = 0.010$ ,  $r = 0.121$ ),  
 484 as well as increased disc herniation at L4-L5 ( $u = 153470.5$ ,  $z = 6.02$ ,  $p < 0.001$ ,  $r = 0.213$ ) were  
 485 found in people suffering from cLBP compared to asymptomatic controls. Univariate statistical  
 486 results for all variable can be found in Supplementary Table 24 – 31.  
 487

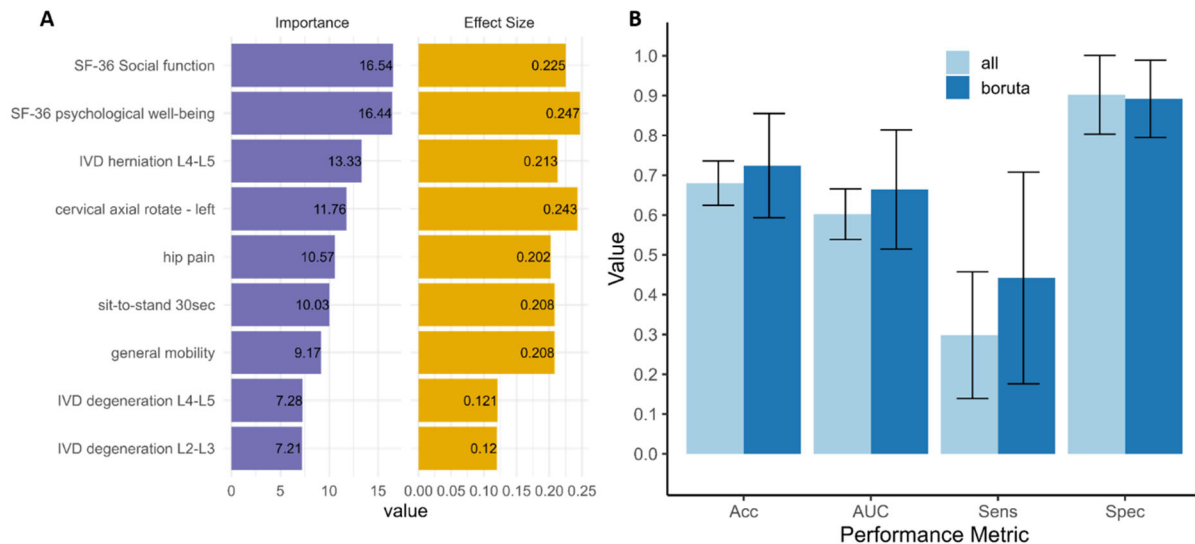

488  
 489 **Figure 3. Most robust and important variables chronic low back pain classification performance.**  
 490 A – Presents a bar plot of the nine most robust variables in order of average Boruta importance score  
 491 (left). The right bar plot shows the absolute effect size (Cohen’s  $r$  or  $\omega$  depending on data type)  
 492 comparing controls and cLBP patients of the nine robust variables. B – Column plot showing RF  
 493 classification performance as mean of five-fold train-test iterations in hold-out set using Boruta selected  
 494 and all features. Column plot error bars represent 95% CI. IVD – intervertebral disc, SF-36 – short form  
 495 36 health status questionnaire, Acc – accuracy, AUC – Area under the receiver operating characteristic  
 496 curve, Sens – sensitivity, Spec – specificity.  
 497



## 498 Discussion

499

500 This study employs a large multi-modal dataset and a machine learning workflow to  
501 demonstrate the importance of using data from different domains in cLBP patient delineation.  
502 Increasing the number of modalities generally lead to a model performance improvement  
503 although it seems the inclusion of back shape and motion data resulted in little to no  
504 performance improvement. Utilising Boruta in our iterative selection workflow resulted in  
505 considerable variable reduction across all datasets (median = 62.7%), while model performance  
506 remained comparable. This may reflect many variables showing little difference between  
507 patients and controls, or the underlying mechanisms are more robustly captured by a small sub-  
508 set of variables. Both the best performing modality model (Q + C + M) and the most robust  
509 variables (Fig. 3), show the importance of measuring psychosocial factors, cervical axial  
510 rotation, general mobility, hip flexion, and lower lumbar spine disc degeneration and herniation  
511 ratings in cLBP patients.

512

513 The questionnaires probing the psychosocial factors, social function and psychological well-  
514 being, showed highest importance among all variables (Fig. 3A) and were the most important  
515 variables in the best sparse model (Boruta reduced questionnaire, Fig. 2A). Moreover, the  
516 questionnaires represent the most cost effective modality to the examiner. Highlighting the  
517 clinical importance of psychosocial factors in cLBP diagnosis and treatment.

518

519 Social functioning describes the ability of a person to engage in social activities, which we have  
520 shown to be an important marker for delineating cLBP patients from asymptomatic controls.  
521 Using cross-sectional data from 180 chronic low back pain patients, Ge and colleagues<sup>16</sup>  
522 showed that these patients reported more limitations in performing (major life tasks and) social  
523 activities as compared to subjects without cLBP, even after adjusting for influencing factors,

524 such as socio-demographics, lifestyle and number of diseases. Furthermore, Tagliaferri et al.<sup>57</sup>  
525 were able to separate 4156 chronic back pain patients from the UK Biobank dataset into five  
526 sub-groups based on their scores of social isolation and depressive symptoms. Interestingly,  
527 increased social isolation was only a feature of three sub-groups, encompassing 26% of all back  
528 pain patients (n = 1085), while the remaining subgroups showed either no changes (4.1%; n =  
529 776) or a reduction in social isolation scores (12%; n = 2296). This prevalence in patients with  
530 LBP may indicate that reduced social functioning was identified by some studies, while others  
531 did not find similar changes as compared to asymptomatic controls<sup>22</sup>. However, as levels of  
532 social function (here: social participation) were found to be correlated with self-perceived  
533 physical health status<sup>58</sup>, a direct impact of social functioning on personal functional  
534 impairments remains feasible.

535  
536 In addition to social function, the psychological health or well-being was shown to be an  
537 important variable in cLBP patient delineation. Using longitudinal data from the SwePain  
538 cohort, including 9361 participants with and without chronic pain, psychological well-being  
539 scores at baseline were able to predict pain intensity after 2 years<sup>28</sup>. Within this study, positive  
540 well-being was predictive of lower pain severity in participants without and with chronic pain.  
541 Similar conclusions were drawn from the comparison of back pain patients with different levels  
542 of mental distress, in which patients with higher mental distress showed, among other things,  
543 reduced psychological well-being, reduced social function, and higher severe pain than patients  
544 with lower mental distress<sup>20</sup>. Furthermore, patients suffering from chronic pain exhibit  
545 significantly lower quality of life scores across all sub-domains, including psychological well-  
546 being<sup>19</sup>. Alterations in quality of life are stronger associated with changes in social functioning  
547 and psychological well-being (via pain catastrophizing) than pain intensity itself<sup>27</sup>, indicating  
548 the high importance of psycho-social aspects for daily living with painful conditions such as  
549 back pain.

550

551 Our findings suggest that spinal herniation and degeneration observed on MRI may contribute  
552 to pain mechanisms in the bio-psychosocial model of cLBP, consistent with previous meta-  
553 analyses<sup>9</sup> indicating a higher prevalence of disc herniation and degeneration on MRI in adults  
554 with cLBP compared with asymptomatic individuals. However, it is clear that MRI findings  
555 alone do not fully explain pain presence in cLBP, highlighting the need for caution when  
556 interpreting MRI results at the individual patient level. Interestingly, cervical spine rotation but  
557 not lumbar back motion assessments were shown to be robust important examinations for cLBP  
558 delineation. This contradictory finding is likely a result of two factors. First, the poor cervical  
559 rotation may be the result of neck pain that has high comorbidity with cLBP<sup>62</sup> and can lead to  
560 decreased axial rotation<sup>44</sup>. Second, poor psychological health has been associated with neck  
561 pain<sup>32</sup>, which we found to also present high importance in patient stratification and relates to  
562 the bio-physical-psychosocial interplay present in cLBP patients<sup>55</sup>. A systematic review on hip  
563 mobility in LBP patients<sup>6</sup> showed small to no changes in hip flexion compared to controls. As  
564 all studies had less than 110 subjects, they were likely under powered to uncover the decreased  
565 mobility we show here and may represent a diagnostic test for LBP. Previous studies have  
566 shown that clinical kinematic data can effectively stratify cLBP patients into high, low and  
567 intermediate risk groups<sup>1</sup>, suggesting that pain correlates with reduced physical function.  
568 Persistent nociceptive input from aggravated spinal joints/muscles may lead to reduced motor  
569 output and spinal cord excitability<sup>38</sup>, potentially resulting in a reduced ability to recruit specific  
570 muscles and necessitating compensatory movement strategies. Our findings underscore that  
571 detailed movement analysis could serve as a diagnostic biomarker for LBP, potentially rivalling  
572 medical imaging in diagnostic accuracy and improving patient care by identifying sub-  
573 populations likely to respond well to specific therapies or at risk of adverse outcomes.

574

575 Classification of cLBP patients has often been conducted on relatively small sample sizes (<  
576 200) as well as utilising a single data domain<sup>53</sup>. Performance of such models are subject to  
577 overfitting due to their small samples and would likely perform poorly at out-of-sample  
578 classification in unseen external datasets<sup>43</sup>. Furthermore, several studies have established  
579 classification models with high accuracy (> 0.8) at determining particular LBP symptoms  
580 <sup>2,3,24,33,45,49,61,70</sup>, although these lack clinical applicability in understanding the most appropriate  
581 variables and modalities in classification of cLBP as well as the classification of the disorder in  
582 general. Classification models created using large datasets (n > 1000) either contained  
583 psychosocial and demographic variables, without imaging and physical features<sup>40,52</sup>. On the  
584 other hand, Jin-Heekun and colleagues<sup>23</sup> employed only physical features without considering  
585 important psychosocial factors, which have shown to be important in previous research<sup>54-57</sup> as  
586 well as in our current study (Fig. 3). Our best model (Boruta – Q + C + M) performed slightly  
587 worse than Parsaeian et al.<sup>40</sup> (AUC 0.693 – 0.75) and compared to Shim et al.<sup>52</sup> (AUC, 0.693  
588 – 0.716), we utilised more plentiful data points per subject in a significantly smaller sample size  
589 (approximately 34x and 6x smaller respectively) to address the clinically relevant question of  
590 what modalities and variables a best suited for cLBP classification.

591  
592 The multimodal nature of the data utilised and the amount of subjects that have participated in  
593 physical, imaging, and questionnaire measurements are major strengths in our current study.  
594 Utilising the “Berlin Back Study” dataset that contains more than 500 subjects in the different  
595 domains highlighted as lacking in a recent review by our group<sup>53</sup>, which enables us to robustly  
596 investigate the importance of different modalities as well as specific variables in cLBP patient  
597 stratification. The large sample size enabled us to minimise model overfitting and data leakage  
598 through cross-validation and hold-out testing samples of good size and variable distributions.  
599 A more accurate representation of a models performance is provided by out-of-sample testing  
600 that uses a new sample population containing comparable variables. This provides a test set

601 with minimised sampling and dataset bias intrinsic within a single, even large, dataset and  
602 greatly improves the generalisability and applicability of the findings. This represents a  
603 limitation in our modelling, but as to our knowledge, there are no available open dataset  
604 containing comparable multi-modality data for out of sample testing. Furthermore, our study  
605 provides a cross-sectional investigation of cLBP, whereas a prospective design would be better  
606 suited to examine the causality of the disorder. Two different types of interviews were  
607 conducted: face-to-face interviews (clinical examination) and electronic interviews  
608 (questionnaires). The main difference is that body language, facial expressions and other non-  
609 verbal social cues are obvious to the interviewer in face-to-face interviews, whereas these  
610 aspects are absent in electronic surveys. As both surveys have advantages and disadvantages,  
611 the answers of the study participants were weighted equally in this study. A further limitation  
612 is that the high number of questions could lead to a reduction in the participants' attention and  
613 concentration.

614

## 615 Conclusion

616 Our study underscores the transformative potential of utilizing multidimensional data across  
617 various modalities for cLBP patient stratification. By integrating physical (mobility), biological  
618 (MRI), and psychological data, we pave the way for more precise, targeted, and individualized  
619 diagnostic and treatment strategies. This holistic approach not only enhances the accuracy of  
620 patient stratification but also significantly improves clinical outcomes, offering a robust  
621 framework for advancing cLBP management.

## 622 **Disclosures**

623 **Funding:** This study is part of the Research Unit FOR 5177 funded by the German Research  
624 Foundation (DFG), Hendrik Schmidt: SCHM 2572/11-1, SCHM 2572/12-1, SCHM 2572/13-  
625 1; Sandra Reitmaeier: RE 4292/3-1, Matthias Pumberger: PU762/1-1. The analyses and  
626 contribution from the Hochschule für Gesundheit were funded, in part, by grant number  
627 50WK2273A (to DLB) from the German AeroSpace Center (DLR).

628 **Conflicts of interest:** All authors declare no conflict of interests.

629

## 630 **Acknowledgments**

631 We would like to thank all patients and healthy participants for their selfless participation in  
632 this study and the participating companies for informing their employees about this study.

633

## 634 **References**

- 635
- 636 1. Abdollahi M, Ashouri S, Abedi M, Azadeh-Fard N, Parnianpour M, Khalaf K, Rashedi  
637 E: Using a Motion Sensor to Categorize Nonspecific Low Back Pain Patients: A  
638 Machine Learning Approach. *Sensors Multidisciplinary Digital Publishing Institute*;  
639 20:3600, 2020.
- 640 2. Abdullah AA, Yaakob A, Ibrahim Z: Prediction of Spinal Abnormalities Using Machine  
641 Learning Techniques. *IEEE*; page 1–62018.
- 642 3. Al Imran A, Rifat MRI, Mohammad R: Enhancing the classification performance of  
643 lower back pain symptoms using genetic algorithm-based feature selection. *Springer*;  
644 page 455–692020.
- 645 4. Anderson TW, Darling DA: Asymptotic Theory of Certain “Goodness of Fit” Criteria  
646 Based on Stochastic Processes. *The Annals of Mathematical Statistics Institute of*  
647 *Mathematical Statistics*; 23:193–212, 1952.
- 648 5. Andersson GB: Epidemiologic aspects on low-back pain in industry. *Spine (Phila Pa*  
649 *1976)* 6:53–60, 1981.
- 650 6. Avman MA, Osmotherly PG, Snodgrass S, Rivett DA: Is there an association between  
651 hip range of motion and nonspecific low back pain? A systematic review.  
652 *Musculoskeletal Science and Practice* 42:38–51, 2019.
- 653 7. Barrett E, McCreesh K, Lewis J: Reliability and validity of non-radiographic methods of  
654 thoracic kyphosis measurement: a systematic review. *Man Ther* 19:10–7, 2014.
- 655 8. Breiman L: Random Forests. *Machine Learning* 45:5–32, 2001.
- 656 9. Brinjikji W, Diehn FE, Jarvik JG, Carr CM, Kallmes DF, Murad MH, Luetmer PH: MRI  
657 Findings of Disc Degeneration are More Prevalent in Adults with Low Back Pain than in  
658 Asymptomatic Controls: A Systematic Review and Meta-Analysis. *AJNR Am J*  
659 *Neuroradiol* 36:2394–9, 2015.
- 660 10. Collins GS, Reitsma JB, Altman DG, Moons KGM: Transparent Reporting of a  
661 multivariable prediction model for Individual Prognosis or Diagnosis (TRIPOD): the  
662 TRIPOD statement. *Ann Intern Med* 162:55–63, 2015.
- 663 11. Craig CL, Marshall AL, Sjöström M, Bauman AE, Booth ML, Ainsworth BE, Pratt M,  
664 Ekelund U, Yngve A, Sallis JF, Oja P: International Physical Activity Questionnaire: 12-  
665 Country Reliability and Validity. *Medicine & Science in Sports & Exercise* 35:1381,  
666 2003.
- 667 12. Deyo RA, Gray DT, Kreuter W, Mirza S, Martin BI: United States trends in lumbar  
668 fusion surgery for degenerative conditions. *Spine (Phila Pa 1976)* 30:1441–5; discussion  
669 1446-1447, 2005.
- 670 13. Dreischarf B, Koch E, Dreischarf M, Schmidt H, Pumberger M, Becker L: Comparison  
671 of three validated systems to analyse spinal shape and motion. *Sci Rep* 12:10222, 2022.

- 672 14. Fujiwara A, Tamai K, Yamato M, An HS, Yoshida H, Saotome K, Kurihashi A: The  
673 relationship between facet joint osteoarthritis and disc degeneration of the lumbar spine:  
674 an MRI study. *Eur Spine J* 8:396–401, 1999.
- 675 15. Gardner B, Abraham C, Lally P, de Bruijn G-J: Towards parsimony in habit  
676 measurement: Testing the convergent and predictive validity of an automaticity subscale  
677 of the Self-Report Habit Index. *International Journal of Behavioral Nutrition and*  
678 *Physical Activity* 9:102, 2012.
- 679 16. Ge L, Pereira MJ, Yap CW, Heng BH: Chronic low back pain and its impact on physical  
680 function, mental health, and health-related quality of life: a cross-sectional study in  
681 Singapore. *Sci Rep* 12:20040, 2022.
- 682 17. Grotle M, Småstuen MC, Fjeld O, Grøvle L, Helgeland J, Storheim K, Solberg TK,  
683 Zwart J-A: Lumbar spine surgery across 15 years: trends, complications and  
684 reoperations in a longitudinal observational study from Norway. *BMJ Open British*  
685 *Medical Journal Publishing Group*; 9:e028743, 2019.
- 686 18. Guerhazi M, Ghroubi S, Kassis M, Jaziri O, Keskes H, Kessomtini W, Ben Hammouda  
687 I, Elleuch M-H: [Validity and reliability of Spinal Mouse to assess lumbar flexion]. *Ann*  
688 *Readapt Med Phys* 49:172–7, 2006.
- 689 19. Hadi MA, McHugh GA, Closs SJ: Impact of Chronic Pain on Patients' Quality of Life:  
690 A Comparative Mixed-Methods Study. *J Patient Exp* 6:133–41, 2019.
- 691 20. Hnatešen D, Pavić R, Radoš I, Dimitrijević I, Budrovac D, Čebohin M, Gusar I: Quality  
692 of Life and Mental Distress in Patients with Chronic Low Back Pain: A Cross-Sectional  
693 Study. *Int J Environ Res Public Health* 19:10657, 2022.
- 694 21. Holm S: A Simple Sequentially Rejective Multiple Test Procedure. *Scandinavian*  
695 *Journal of Statistics* [Board of the Foundation of the Scandinavian Journal of Statistics,  
696 Wiley]; 6:65–70, 1979.
- 697 22. Iguti AM, Guimarães M, Barros MBA: Health-related quality of life (SF-36) in back  
698 pain: a population-based study, Campinas, São Paulo State, Brazil. *Cad Saude Publica*  
699 37:e00206019, 2021.
- 700 23. Jin-Heeku: Analysis of sitting posture using wearable sensor data and support vector  
701 machine model. *Medico-Legal Update* 1:334–8, 2018.
- 702 24. Karabulut EM, Ibrikci T: Effective automated prediction of vertebral column pathologies  
703 based on logistic model tree with SMOTE preprocessing. *Journal of Medical Systems*  
704 38:50, 2014.
- 705 25. Kraemer J: Natural course and prognosis of intervertebral disc diseases. *International*  
706 *Society for the Study of the Lumbar Spine Seattle, Washington, June 1994. Spine (Phila*  
707 *Pa 1976)* 20:635–9, 1995.
- 708 26. Kurasa MB, Rudnicki WR: Feature Selection with the Boruta Package. *Journal of*  
709 *Statistical Software* 36:1–13, 2010.



- 710 27. Lamé IE, Peters ML, Vlaeyen JWS, Kleef M v, Patijn J: Quality of life in chronic pain is  
711 more associated with beliefs about pain, than with pain intensity. *Eur J Pain* 9:15–24,  
712 2005.
- 713 28. Larsson B, Dragioti E, Gerdle B, Björk J: Positive psychological well-being predicts  
714 lower severe pain in the general population: a 2-year follow-up study of the SwePain  
715 cohort. *Ann Gen Psychiatry* 18:8, 2019.
- 716 29. Lee W, Alexeyenko A, Pernemalm M, Guegan J, Dessen P, Lazar V, Lehtiö J, Pawitan  
717 Y: Identifying and Assessing Interesting Subgroups in a Heterogeneous Population.  
718 *Biomed Res Int* 2015:462549, 2015.
- 719 30. Lonsdale C, Hodge K, Rose EA: The behavioral regulation in sport questionnaire  
720 (BRSQ): Instrument development and initial validity evidence. *Journal of Sport &  
721 Exercise Psychology US: Human Kinetics*; 30:323–55, 2008.
- 722 31. Lötsch J, Utsch A: Machine learning in pain research. *Pain* 159:623–30, 2018.
- 723 32. Mansfield M, Thacker M, Taylor JL, Bannister K, Spahr N, Jong ST, Smith T: The  
724 association between psychosocial factors and mental health symptoms in cervical spine  
725 pain with or without radiculopathy on health outcomes: a systematic review. *BMC  
726 Musculoskeletal Disorders* 24:235, 2023.
- 727 33. Mathew B, Norris D, Hendry D, Waddell G: Artificial intelligence in the diagnosis of  
728 low-back pain and sciatica. *Spine* 13:168–72, 1988.
- 729 34. Meucci RD, Fassa AG, Faria NMX: Prevalence of chronic low back pain: systematic  
730 review. *Rev Saude Publica* 49:1, 2015.
- 731 35. Meyerding HW: Spondyloptosis. *Surgery, Gynecology & Obstetrics* :371–7, 1932.
- 732 36. Modic MT, Steinberg PM, Ross JS, Masaryk TJ, Carter JR: Degenerative disk disease:  
733 assessment of changes in vertebral body marrow with MR imaging. *Radiology* 166:193–  
734 9, 1988.
- 735 37. Mwangi B, Tian TS, Soares JC: A review of feature reduction techniques in  
736 neuroimaging. *Neuroinformatics* 12:229–44, 2014.
- 737 38. Nijs J, Daenen L, Cras P, Struyf F, Roussel N, Oostendorp RAB: Nociception affects  
738 motor output: a review on sensory-motor interaction with focus on clinical implications.  
739 *Clin J Pain* 28:175–81, 2012.
- 740 39. Noroozi Z, Orooji A, Erfannia L: Analyzing the impact of feature selection methods on  
741 machine learning algorithms for heart disease prediction. *Sci Rep Nature Publishing  
742 Group*; 13:22588, 2023.
- 743 40. Parsaeian M, Mohammad K, Mahmoudi M, Zeraati H: Comparison of logistic regression  
744 and artificial neural network in low back pain prediction: second national health survey.  
745 *Iranian Journal of Public Health* 41:86, 2012.
- 746 41. Pastorino R, De Vito C, Migliara G, Glocker K, Binenbaum I, Ricciardi W, Boccia S:  
747 Benefits and challenges of Big Data in healthcare: an overview of the European  
748 initiatives. *Eur J Public Health* 29:23–7, 2019.

- 749 42. Pfirmann CW, Metzdorf A, Zanetti M, Hodler J, Boos N: Magnetic resonance  
750 classification of lumbar intervertebral disc degeneration. *Spine* 26:1873–8, 2001.
- 751 43. Rajput D, Wang W-J, Chen C-C: Evaluation of a decided sample size in machine  
752 learning applications. *BMC Bioinformatics* 24:48, 2023.
- 753 44. Rampazo ÉP, da Silva VR, de Andrade ALM, Back CGN, Madeleine P, Arendt-Nielsen  
754 L, Liebano RE: Sensory, Motor, and Psychosocial Characteristics of Individuals With  
755 Chronic Neck Pain: A Case Control Study. *Physical Therapy* 101:pzab104, 2021.
- 756 45. Riveros NAM, Espitia BAC, Pico LEA: Comparison between K-means and self-  
757 organizing maps algorithms used for diagnosis spinal column patients. *Informatics in*  
758 *Medicine Unlocked* 16:100206, 2019.
- 759 46. Roland M, Fairbank J: The Roland–Morris Disability Questionnaire and the Oswestry  
760 Disability Questionnaire. *Spine* 25:3115, 2000.
- 761 47. Roldán-Jiménez C, Pérez-Cruzado D, Neblett R, Gatchel R, Cuesta-Vargas A: Central  
762 Sensitization in Chronic Musculoskeletal Pain Disorders in Different Populations: A  
763 Cross-Sectional Study. *Pain Med* 21:2958–63, 2020.
- 764 48. Rusu AC, Kreddig N, Hallner D, Hülsebusch J, Hasenbring MI: Fear of  
765 movement/(Re)injury in low back pain: confirmatory validation of a German version of  
766 the Tampa Scale for Kinesiophobia. *BMC Musculoskelet Disord* 15:280, 2014.
- 767 49. Sandag GA, Tedry NE, Lolong S: Classification of lower back pain using K-Nearest  
768 Neighbor algorithm. *IEEE*; page 1–52018.
- 769 50. Schizas C, Theumann N, Burn A, Tansey R, Wardlaw D, Smith FW, Kulik G:  
770 Qualitative grading of severity of lumbar spinal stenosis based on the morphology of the  
771 dural sac on magnetic resonance images. *Spine (Phila Pa 1976)* 35:1919–24, 2010.
- 772 51. Shilo S, Rossman H, Segal E: Axes of a revolution: challenges and promises of big data  
773 in healthcare. *Nat Med Nature Publishing Group*; 26:29–38, 2020.
- 774 52. Shim J-G, Ryu K-H, Cho E-A, Ahn JH, Kim HK, Lee Y-J, Lee SH: Machine Learning  
775 Approaches to Predict Chronic Lower Back Pain in People Aged over 50 Years.  
776 *Medicina Multidisciplinary Digital Publishing Institute*; 57:1230, 2021.
- 777 53. Tagliaferri SD, Angelova M, Zhao X, Owen PJ, Miller CT, Wilkin T, Belavy DL:  
778 Artificial intelligence to improve back pain outcomes and lessons learnt from clinical  
779 classification approaches: three systematic reviews. *npj Digital Medicine* 3:93, 2020.
- 780 54. Tagliaferri SD, Fitzgibbon BM, Owen PJ, Miller CT, Bowe SJ, Belavy DL: Brain  
781 structure, psychosocial, and physical health in acute and chronic back pain: a  
782 UKBioBank study. *Pain* 163:1277–90, 2022.
- 783 55. Tagliaferri SD, Ng S-K, Fitzgibbon BM, Owen PJ, Miller CT, Bowe SJ, Belavy DL:  
784 Relative contributions of the nervous system, spinal tissue and psychosocial health to  
785 non-specific low back pain: Multivariate meta-analysis. *Eur J Pain* , 2021.
- 786 56. Tagliaferri SD, Owen PJ, Miller CT, Angelova M, Fitzgibbon BM, Wilkin T, Masse-  
787 Alarie H, Van Oosterwijck J, Trudel G, Connell D, Taylor A, Belavy DL: Towards data-

- 788 driven biopsychosocial classification of non-specific chronic low back pain: a pilot  
789 study. *Sci Rep Nature Publishing Group*; 13:13112, 2023.
- 790 57. Tagliaferri SD, Wilkin T, Angelova M, Fitzgibbon BM, Owen PJ, Miller CT, Belavy  
791 DL: Chronic back pain sub-grouped via psychosocial, brain and physical factors using  
792 machine learning. *Sci Rep* 12:15194, 2022.
- 793 58. Takeyachi Y, Konno S, Otani K, Yamauchi K, Takahashi I, Suzukamo Y, Kikuchi S:  
794 Correlation of low back pain with functional status, general health perception, social  
795 participation, subjective happiness, and patient satisfaction. *Spine (Phila Pa 1976)*  
796 28:1461–6; discussion 1467, 2003.
- 797 59. Tanaka K, Nishigami T, Mibu A, Imai R, Manfuku M, Tanabe A: Combination of Pain  
798 Location and Pain Duration is Associated with Central Sensitization-Related Symptoms  
799 in Patients with Musculoskeletal Disorders: A Cross-Sectional Study. *Pain Pract* 21:646–  
800 52, 2021.
- 801 60. Topalidou A, Tzagarakis G, Souvatzis X, Kontakis G, Katonis P: Evaluation of the  
802 reliability of a new non-invasive method for assessing the functionality and mobility of  
803 the spine. *Acta Bioeng Biomech* 16:117–24, 2014.
- 804 61. Vaughn ML, Cavill SJ, Taylor SJ, Foy MA, Fogg AJ: Direct explanations for the  
805 development and use of a multi-layer perceptron network that classifies low-back-pain  
806 patients. *International Journal of Neural Systems* 11:335–47, 2001.
- 807 62. von der Lippe E, Krause L, Porst M, Wengler A, Leddin J, Müller A, Zeisler M-L,  
808 Anton A, Rommel A: Prevalence of back and neck pain in Germany. Results from the  
809 BURDEN 2020 Burden of Disease Study. *J Health Monit* 6:2–14, 2021.
- 810 63. von Elm E, Altman DG, Egger M, Pocock SJ, Gøtzsche PC, Vandembroucke JP: The  
811 Strengthening the Reporting of Observational Studies in Epidemiology (STROBE)  
812 Statement: Guidelines for reporting observational studies. *Preventive Medicine* 45:247–  
813 51, 2007.
- 814 64. Von Korff M, Ormel J, Keefe FJ, Dworkin SF: Grading the severity of chronic pain.  
815 *PAIN* 50:133, 1992.
- 816 65. Waddell G, Newton M, Henderson I, Somerville D, Main CJ: A Fear-Avoidance Beliefs  
817 Questionnaire (FABQ) and the role of fear-avoidance beliefs in chronic low back pain  
818 and disability. *PAIN* 52:157, 1993.
- 819 66. Ware JE, Sherbourne CD: The MOS 36-item short-form health survey (SF-36). I.  
820 Conceptual framework and item selection. *Med Care* 30:473–83, 1992.
- 821 67. World Medical Association: World Medical Association Declaration of Helsinki: ethical  
822 principles for medical research involving human subjects. *JAMA* 310:2191–4, 2013.
- 823 68. Wright MN, Ziegler A: ranger: A Fast Implementation of Random Forests for High  
824 Dimensional Data in C++ and R. *Journal of Statistical Software* 77:1–17, 2017.
- 825 69. Yoshihara H, Yoneoka D: National trends in the surgical treatment for lumbar  
826 degenerative disc disease: United States, 2000 to 2009. *Spine J* 15:265–71, 2015.

827 70. Zhang W, Chen Z, Su Z, Wang Z, Hai J, Huang C, Wang Y, Yan B, Lu H: Deep  
828 learning-based detection and classification of lumbar disc herniation on magnetic  
829 resonance images. JOR SPINE 6:e1276, 2023.

830
